# Supplementary material
Source: publisher figshare collection journal article supplement (https://acs.figshare.com/ndownloader/files/26042442)
Supplement: Supplementary file 1 [file 26042442]

## Supplemental information

### **A Sequential Autohydrolysis-Ionic Liquid Fractionation Process for High Quality Lignin Production**

Jing Wang <sup>a,b</sup>, Kalavathy Rajan <sup>a</sup>, Aparna Annamraju <sup>a,c</sup>, Stephen C. Chmely <sup>d</sup>, Sai Venkatesh Pingali <sup>e</sup>, Danielle Julie Carrier <sup>b</sup>, and Nicole Labbé <sup>a,c\*</sup>

#### **Author affiliations**

<sup>a</sup> Center of Renewable Carbon, The University of Tennessee Institute of Agriculture, Knoxville, TN 37996, USA.

<sup>b</sup> Department of Biosystems Engineering and Soil Science, The University of Tennessee Institute of Agriculture, Knoxville, TN 37996, USA.

<sup>c</sup> Department of Forestry, Wildlife and Fisheries, The University of Tennessee Institute of Agriculture, Knoxville, TN 37996, USA.

<sup>d</sup> Department of Agricultural and Biological Engineering, Pennsylvania State University, 225 Ag Engineering Building, Shortlidge Road, University Park, PA 16802, USA.

<sup>e</sup> Neutron Scattering Division, Oak Ridge National Laboratory, P. O. Box 2008, Oak Ridge, TN 37831, USA.

**\* Corresponding author contact information:** Center for Renewable Carbon, The University of Tennessee, 2506 Jacob Drive, Knoxville, TN 37996, USA. **Email:** nlabbe@utk.edu. **Phone:** +1 (865) 946-1126.

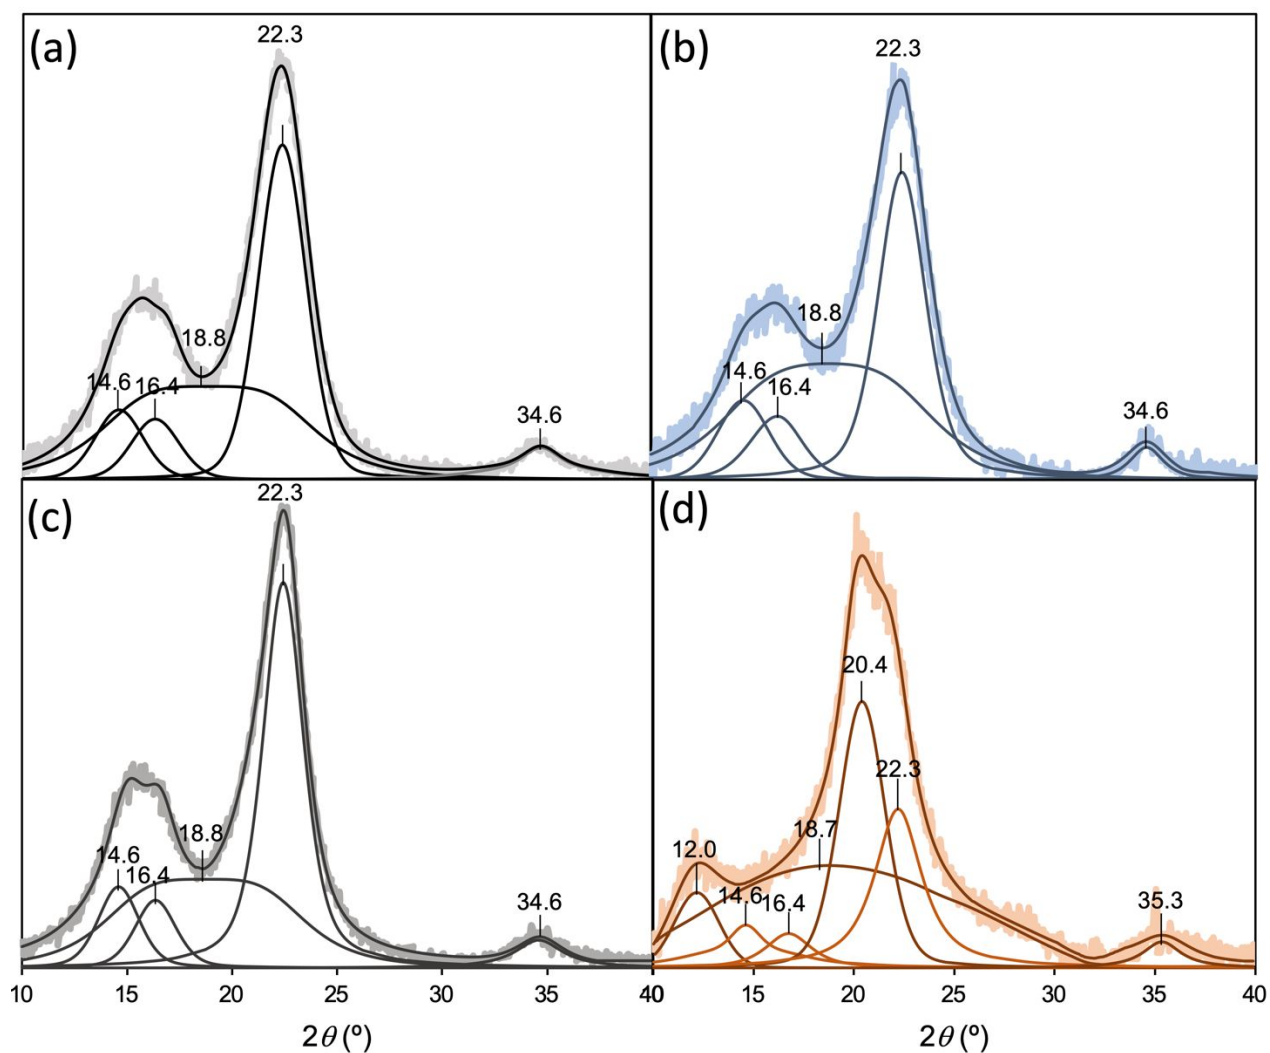

**Figure S1.** Deconvoluted X-ray diffractograms of hybrid poplar wood powder using Pseudo-Voigt function. The amorphous peaks were fitted using InvsPoly function in OriginPro 2020. All peaks were fitted until they converged at  $R^2 = 0.99$ . Legend: (a) Untreated hybrid poplar (HP); (b) IL-activated HP; (c) Autohydrolyzed HP; (d) Autohydrolyzed + IL-activated HP. Autohydrolysis pretreatment was performed at 160 °C for 60 min and IL-activation was performed with 1-ethyl-3-methylimidazolium acetate at 60 °C for 3 h.

**Table S1.** Calculation of Cellulose Crystallinity Index (CrI) of Pretreated and Untreated Hybrid Poplar Wood Powder following the Peak Deconvolution Method.

| Sample name                     | Total Cellulose-I<br>crystalline area * | Total Cellulose-II<br>crystalline area * | Amorphous area * | % Cellulose-I<br>crystallinity <sup>†</sup> | % Cellulose-II<br>crystallinity <sup>†</sup> |
|---------------------------------|-----------------------------------------|------------------------------------------|------------------|---------------------------------------------|----------------------------------------------|
| Control                         | 1089                                    | n/a                                      | 798              | 58                                          | n/a                                          |
| IL-activated                    | 797                                     | n/a                                      | 726              | 52                                          | n/a                                          |
| Autohydrolyzed                  | 1408                                    | n/a                                      | 975              | 59                                          | n/a                                          |
| Autohydrolyzed+IL-<br>activated | 458                                     | 572                                      | 798              | 25                                          | 31                                           |

<sup>†</sup>Crystallinity index (%) was calculated using the formula  $\frac{\text{Peak area}_{\text{crystalline cellulose I or II}}}{\text{Area}_{\text{crystalline cellulose I}} + \text{Area}_{\text{crystalline cellulose II}} + \text{Area}_{\text{amorphous}}} \times 100$

\*Peak areas were determined after baseline treatment and integration of delimited area using the Peak Analyzer dialog box in OriginPro 2020 software.

**Table S2.** Semi-quantitative Estimation of Inter-unit Linkages in Hybrid Poplar Lignin using 2D HSQC NMR Analysis.

| <b>Inter-unit linkage</b>      | <b>Chemical shift<br/><math>\delta C/\delta H</math> (ppm)</b> | <b>Native biomass<sup>†</sup></b> | <b>Ionic liquid (IL)-<br/>lignin<sup>†</sup></b> |
|--------------------------------|----------------------------------------------------------------|-----------------------------------|--------------------------------------------------|
| Aryl ether ( $\beta$ -O-4)     | 72.7/5.0                                                       | 27.3                              | 24.4                                             |
| Phenylcoumaran ( $\beta$ -5)   | 87.4/5.7                                                       | 3.1                               | 1.1                                              |
| Resinol ( $\beta$ - $\beta'$ ) | 85.7/4.7                                                       | 4.6                               | 6.1                                              |
| Total ether side chains        | n/a                                                            | 35.0                              | 31.7                                             |
| p-Hydroxybenzoate (P)          | 131.7/7.8                                                      | 4.9                               | 3.9                                              |
| Stilbene (SB)                  | 127.9/7.0                                                      | 0                                 | 1.9                                              |

<sup>†</sup> The number of inter-unit linkages are expressed as,  $\frac{\int X}{\left(\frac{\int S_{2,6}}{2}\right) + \int G_2} \times 100$ ; where *P* and *SB* integral values are obtained by dividing the cross-peak intensities by 2.
